# Supplementary material for: AMPK induces regulatory innate lymphoid cells after traumatic brain injury
Source: PubMed Central journal article supplement (PMC7821592; doi:10.1172/jci.insight.126766), 2021-01-11
Supplement: jciinsight-6-126766-s016.pdf [file jciinsight-6-126766-s016.pdf]

844 **Supplemental Data**

| SEX | AGE | DIAGNOSIS                                                 |
|-----|-----|-----------------------------------------------------------|
| M   | 72  | Normal pressure hydrocephalus                             |
| F   | 47  | Normal pressure hydrocephalus                             |
| F   | 70  | Normal pressure hydrocephalus                             |
| M   | 66  | Normal pressure hydrocephalus                             |
| M   | 60  | Normal pressure hydrocephalus                             |
| M   | 58  | Normal pressure hydrocephalus                             |
| M   | 19  | TBI – Motor vehicle accident (GCS = 3)                    |
| M   | 19  | TBI – Motor vehicle accident (GCS = 7)                    |
| M   | 36  | TBI – Motor vehicle accident (GCS = 7T)                   |
| M   | 18  | TBI – Motor vehicle accident (GCS = 8)                    |
| M   | 38  | TBI – Non-penetrating, secondary to projectile (GCS = 3T) |
| F   | 28  | TBI – Motor vehicle accident (GCS = 8)                    |

845

846 **Supplemental Table 1. Demographic data of NPH and TBI patients used in CSF collection.**  
 847 Cerebrospinal fluid (CSF) was collected by lumbar puncture from six consecutive NPH patients  
 848 while CSF was collected from six consecutive severe TBI patients requiring extraventricular  
 849 drainage. Sex, age, cause of trauma, and Glasgow Coma Scale (GCS) score of patients at the time  
 850 of sample collection are provided.

851  
 852

| SEX | AGE     | CAUSE OF TBI                             |
|-----|---------|------------------------------------------|
| M   | 47      | Penetrating brain injury                 |
| M   | 21      | Motor vehicle accident                   |
| M   | unknown | Non-penetrating, secondary to projectile |
| F   | 56      | Motor vehicle accident                   |
| M   | 44      | Non-penetrating, secondary to projectile |
| M   | 28      | Motor vehicle accident                   |

853  
854  
855  
856  
857

**Supplemental Table 2. Demographic data of TBI patients used in dura collection.** Dura was surgically excised from six consecutive severe TBI patients requiring a hemicraniectomy due to TBI. Sex, age, and cause of trauma for patients are provided.

858  
859  
860  
861  
862  
863  
864  
865  
866  
867  
868

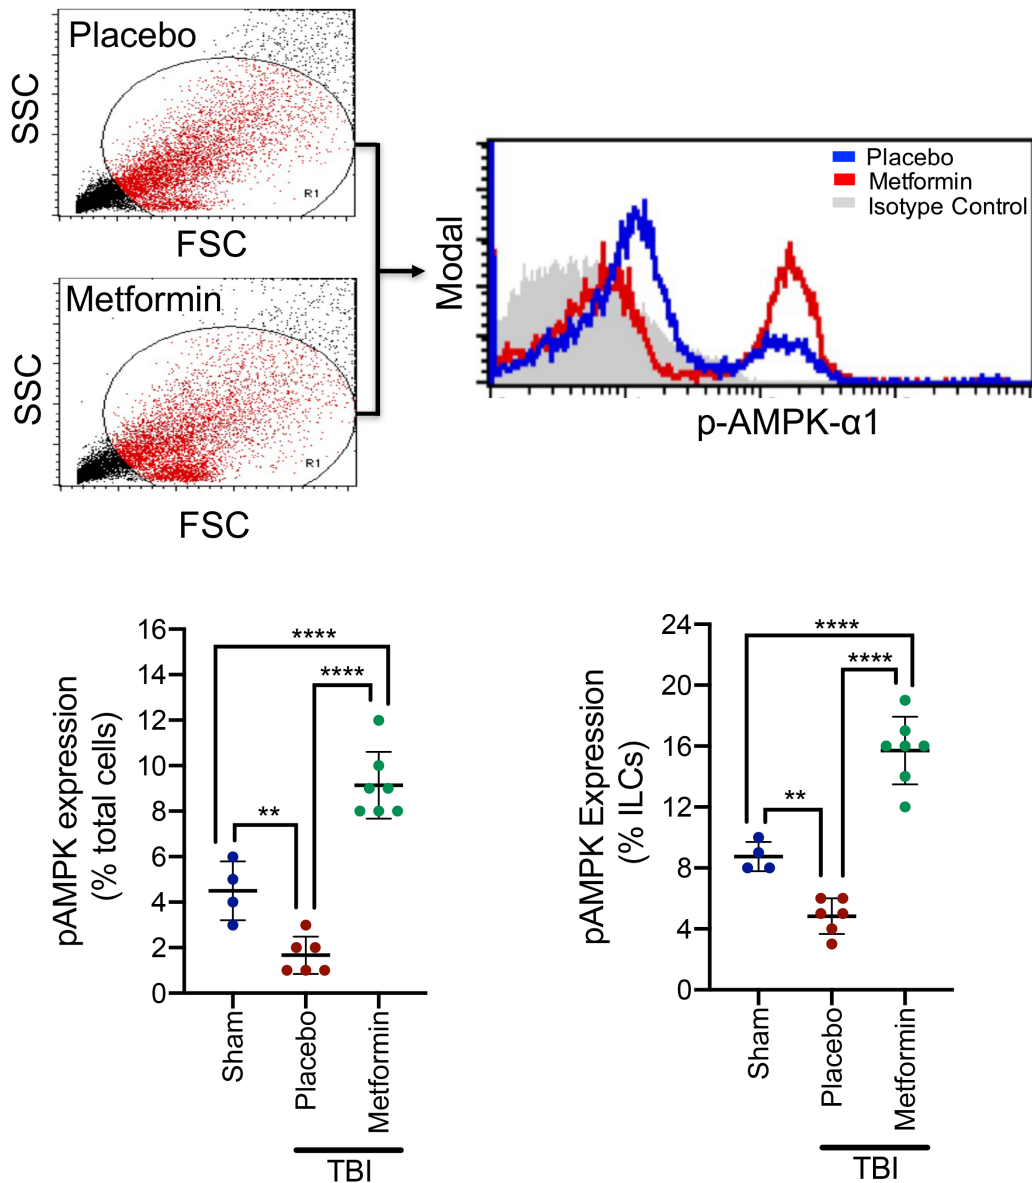

869  
 870  
 871  
 872  
 873  
 874  
 875  
 876  
 877  
 878  
 879

**Supplemental Data Figure 1. Intracisternal administration of metformin increased meningeal AMPK activation after TBI.** Placebo (PBS) or metformin (3  $\mu$ g) was intracisternally administered to mixed sex C57Bl/6J mice at 2h post-TBI. Meningeal tissue was collected at day 5 post-TBI and phosphorylated AMPK $\alpha$ 1 (p-AMPK $\alpha$ 1) was quantified by flow cytometry. Grey shaded areas indicate isotype controls. Graphs indicate the % of total meningeal cells and % total ILCs that are positive for p-AMPK $\alpha$ 1. Quantified data (n=4-6/group) are expressed as mean  $\pm$  SD and were compared using a Student's t-test (\*\*p<0.01, \*\*\*\*p<0.0001).

880

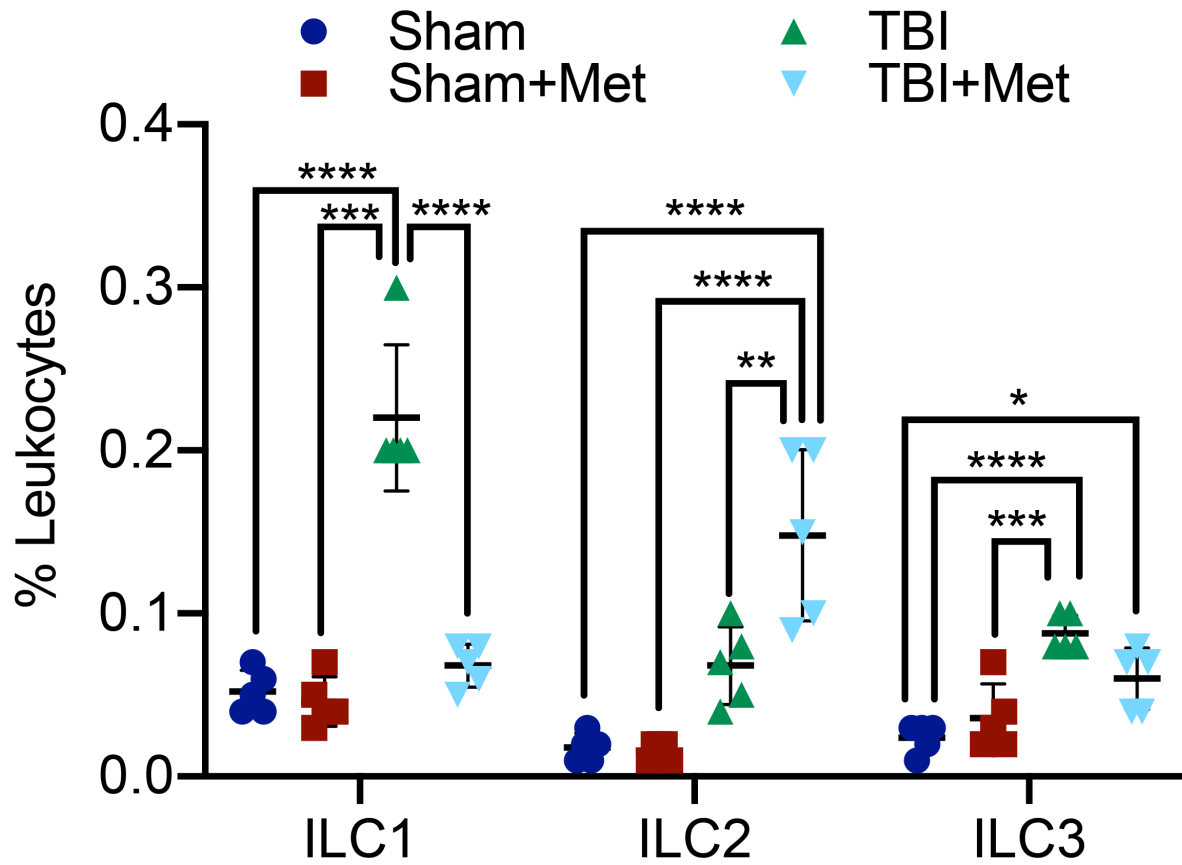

881

882 **Supplemental Data Figure 2. Metformin increases CNS-resident ILC2 after experimental**  
 883 **TBI.** Placebo (PBS) or Metformin (3  $\mu$ g) was intracisternally administered to mixed sex C57Bl/6J  
 884 mice at 2h post-sham/TBI. Isolated meninges were analyzed by flow cytometry, as shown in Fig  
 885 3, at day 7 post-sham/TBI. Quantified data (n=5 mice/group), which depict ILC subtypes as %  
 886 leukocytes, are presented as mean  $\pm$  SD and compared using a One-Way ANOVA followed by  
 887 Tukey's post-hoc test (\*\*p<0.01, \*\*\*\*p<0.0001).  
 888

889

890

891

892

893

894

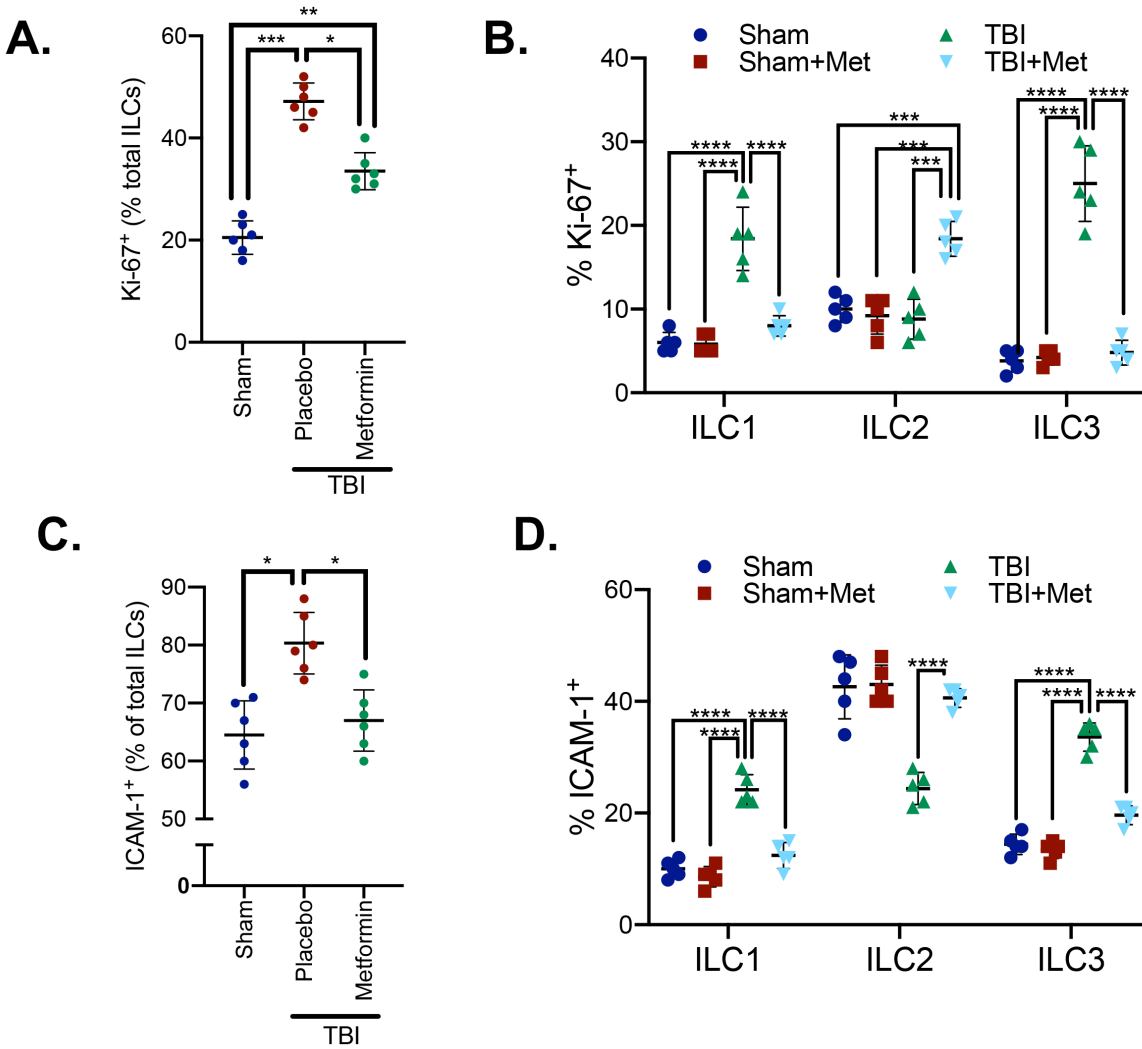

895

896 **Supplemental Data Figure 3. Metformin suppresses ILC proliferation and migration.**

897 Placebo (PBS) or metformin (3  $\mu$ g) was intracisternally administered at 2h post-TBI in mixed sex  
 898 C57Bl/6J mice. At day 3 post-sham/TBI, ILCs were identified as CD45<sup>+</sup>, lineage negative (Lin<sup>-</sup>),  
 899 CD127<sup>+</sup> lymphoid cells. Cellular proliferation in (A., C.) total ILCs and (B., D.) ILC subtypes was  
 900 quantified using Ki-67 while migration was assessed using ICAM-1. Quantified data (n=5  
 901 mice/group) are shown in scatterplots. Data were compared using a One-Way ANOVA followed  
 902 by Tukey's post-hoc test with corrections for multiple comparisons (\*p<0.05, \*\*p<0.01,  
 903 \*\*\*p<0.001).

904

905

906

907

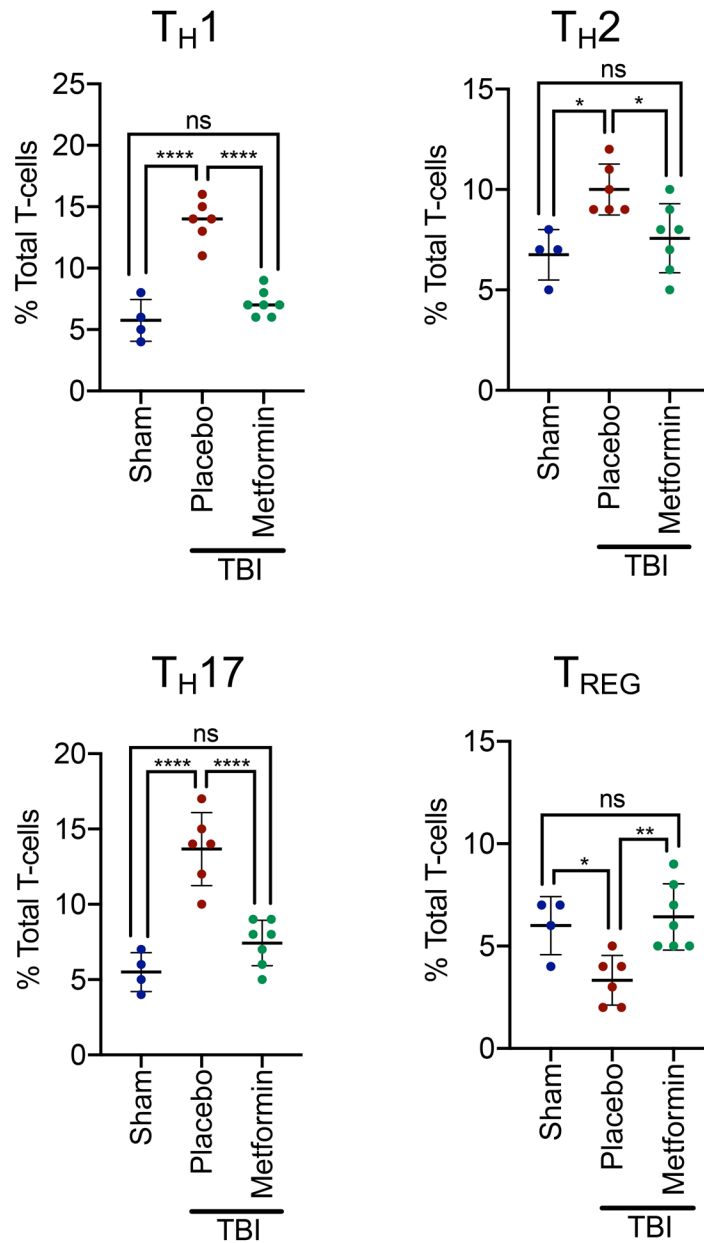

908

909

910 **Supplemental Data Figure 4. Intracisternal administration of metformin modulates T-cell**  
 911 **polarization within the brain after TBI.** Placebo (PBS) or metformin (3  $\mu$ g) was intracisternally  
 912 administered at 2h post-TBI in mixed sex C57Bl/6J mice. At day 3 post-TBI, peri-contusional  
 913 brain tissue was collected and T-cell polarization was assessed by flow cytometry. Scatterplots  
 914 show quantified data for TH1 (CD4<sup>+</sup>IFN $\gamma$ <sup>+</sup>), TH2 (CD4<sup>+</sup>IL-4<sup>+</sup>), TH17 (CD4<sup>+</sup>IL-17<sup>+</sup>) and T<sub>REG</sub>  
 915 (CD4<sup>+</sup>Foxp3<sup>+</sup>). Data (n=4-7 mice/group) were compared using a One-Way ANOVA followed by  
 916 Tukey's post-hoc test with corrections for multiple comparisons (\*p<0.05, \*\*p<0.01,  
 917 \*\*\*\*p<0.0001).

918

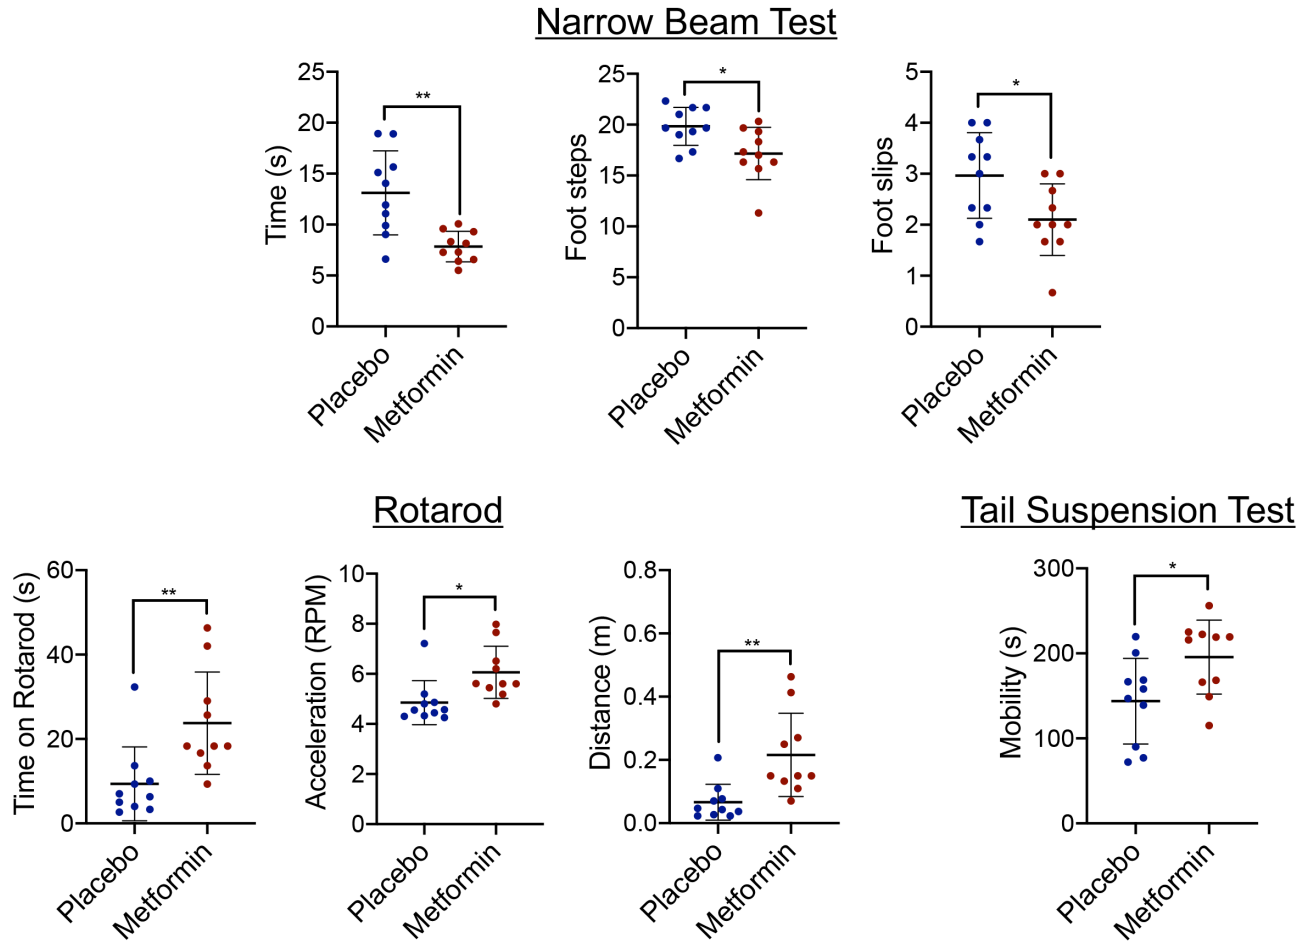

919  
920

921 **Supplemental Data Figure 5. Metformin improved neurological outcomes after TBI.**  
 922 Placebo (PBS) or metformin (3  $\mu$ g) was intracisternally administered at 2h post-TBI. At day 3  
 923 post-TBI, motor function was assessed using the narrow beam test and the rotarod test. On day 4  
 924 post-TBI, depressive behavior was quantified using the tail suspension test. Scatterplots depict  
 925 individual values (n=10/group) and mean  $\pm$  SEM from two independent experiments. Statistical  
 926 significance was determined using a Student's t-test (\*p<0.05, \*\*p<0.01).
